# Supplementary material for: Homogeneously magnetically concentrated silver nanoparticles for uniform “hot spots” in surface enhanced Raman spectroscopy
Source: Royal Society of Chemistry journal article supplement (doi:10.1039/c5ra11660k), 2015-01-01
Supplement: c5ra11660k1.pdf [file c5ra11660k1.pdf]

Supporting Information for  
**Homogenously Magnetically Concentrated Silver Nanoparticles for  
Uniform “Hot Spots” in Surface Enhanced Raman Spectroscopy**

by Andrew Frank, Alanna McEneny-King, Nicole Cathcart and Vladimir Kitaev

| Concentration (M)      | Log (Concentration) (M) | Counts  | Standard Deviation | Log(Counts) | SNR  |
|------------------------|-------------------------|---------|--------------------|-------------|------|
| $7.40 \times 10^{-12}$ | -11.1                   | 17.24   | 32.8               | 1.24        | 0.69 |
|                        |                         | 80.54   |                    | 1.91        | 3.21 |
|                        |                         | 64.06   |                    | 1.81        | 2.55 |
| $7.40 \times 10^{-11}$ | -10.1                   | 256.07  | 7.91               | 2.41        | 10.2 |
|                        |                         | 244.98  |                    | 2.39        | 9.75 |
|                        |                         | 260.30  |                    | 2.42        | 10.4 |
| $7.40 \times 10^{-10}$ | -9.13                   | 354.76  | 120                | 2.55        | 14.1 |
|                        |                         | 121.75  |                    | 2.09        | 4.85 |
|                        |                         | 287.39  |                    | 2.46        | 11.4 |
| $7.40 \times 10^{-9}$  | -8.13                   | 310.90  | 129                | 2.49        | 12.4 |
|                        |                         | 564.42  |                    | 2.75        | 22.5 |
|                        |                         | 476.13  |                    | 2.68        | 19.0 |
| $7.40 \times 10^{-8}$  | -7.13                   | 630.06  | 59.3               | 2.80        | 25.1 |
|                        |                         | 513.78  |                    | 2.71        | 20.5 |
|                        |                         | 591.82  |                    | 2.77        | 23.6 |
| $7.40 \times 10^{-7}$  | -6.13                   | 1081.86 | 147                | 3.03        | 43.1 |
|                        |                         | 1312.41 |                    | 3.12        | 52.3 |
|                        |                         | 1460.63 |                    | 3.16        | 58.2 |
|                        |                         | 1470.68 |                    | 3.17        | 58.6 |
|                        |                         | 1438.86 |                    | 3.16        | 57.3 |
|                        |                         | 1377.46 |                    | 3.14        | 54.8 |
| $7.40 \times 10^{-6}$  | -5.13                   | 1997.30 | 249                | 3.30        | 79.5 |
|                        |                         | 2352.80 |                    | 3.37        | 93.7 |
|                        |                         | 2502.04 |                    | 3.40        | 99.6 |
|                        |                         | 2591.74 |                    | 3.41        | 103  |
|                        |                         | 2295.64 |                    | 3.36        | 91.4 |
|                        |                         | 2698.02 |                    | 3.43        | 107  |
| $7.40 \times 10^{-5}$  | -4.13                   | 4898.46 | 491                | 3.69        | 195  |
|                        |                         | 4953.71 |                    | 3.69        | 197  |
|                        |                         | 5391.35 |                    | 3.73        | 215  |
|                        |                         | 5399.80 |                    | 3.73        | 215  |
|                        |                         | 4109.72 |                    | 3.61        | 164  |
|                        |                         | 5297.38 |                    | 3.72        | 211  |
| $7.40 \times 10^{-4}$  | -3.13                   | 7998.84 | 403                | 3.90        | 319  |
|                        |                         | 7280.80 |                    | 3.86        | 290  |
|                        |                         | 7255.95 |                    | 3.86        | 289  |
|                        |                         | 6935.66 |                    | 3.84        | 276  |
|                        |                         | 7758.50 |                    | 3.89        | 309  |
|                        |                         | 7127.91 |                    | 3.85        | 284  |

Table S1. Raman signal data illustrating reproducibility and detection limits of AgJ<sub>13</sub>NP-MH as a substrate and DTNB as an analyte. The signal to noise ratio (SNR) indicates detection of DTNB in concentrations as low as  $7.40 \times 10^{-12}$  M. A SNR >3 was used as a criterion for reliable detection.

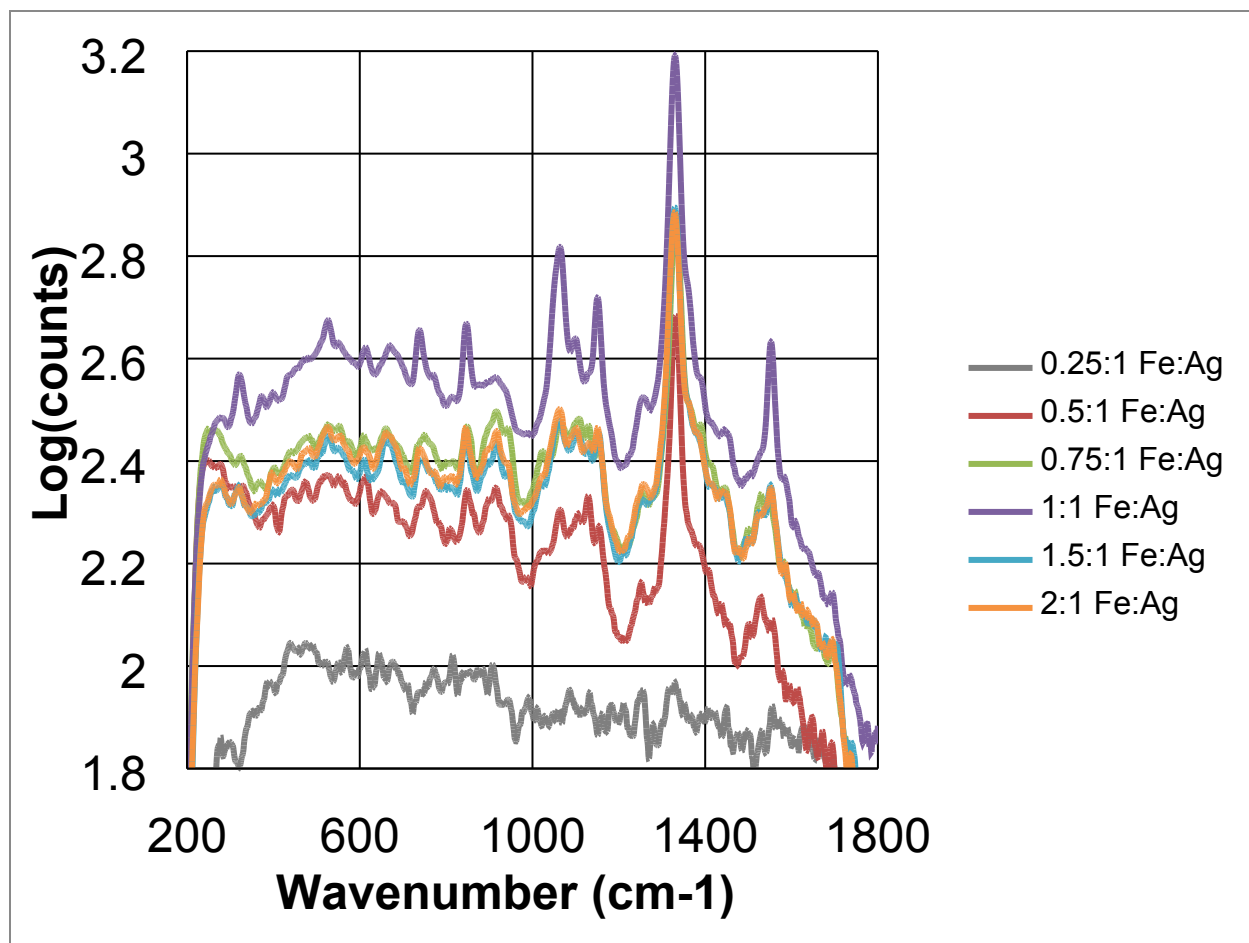

Figure S1. Raman spectra of DTNB for different amounts of maghemite in AgJ<sub>13</sub>NP-MH expressed by the molar ratio between iron and silver (Fe:Ag). It can be clearly seen that the best ratio for detection of DTNB is 1:1 Fe:Ag. DTNB concentration was  $7.41 \times 10^{-7}$  M for all samples.

| Fe:Ag  | Counts | Log (Counts) |
|--------|--------|--------------|
| 0.25:1 | 21     | 1.32         |
| 0.50:1 | 364    | 2.56         |
| 0.75:1 | 553    | 2.74         |
| 1:1    | 1412   | 3.15         |
| 1.5:1  | 902    | 2.96         |
| 2:1    | 663    | 2.82         |

Table S2. Data on Raman signal intensity at  $1330\text{ cm}^{-1}$  expressed as Counts and Log(Counts), from Figure S1 showing that the best ratio of Fe:Ag in  $\text{AgJ}_{13}\text{NP-MH}$  for detection of DTNB is 1:1.

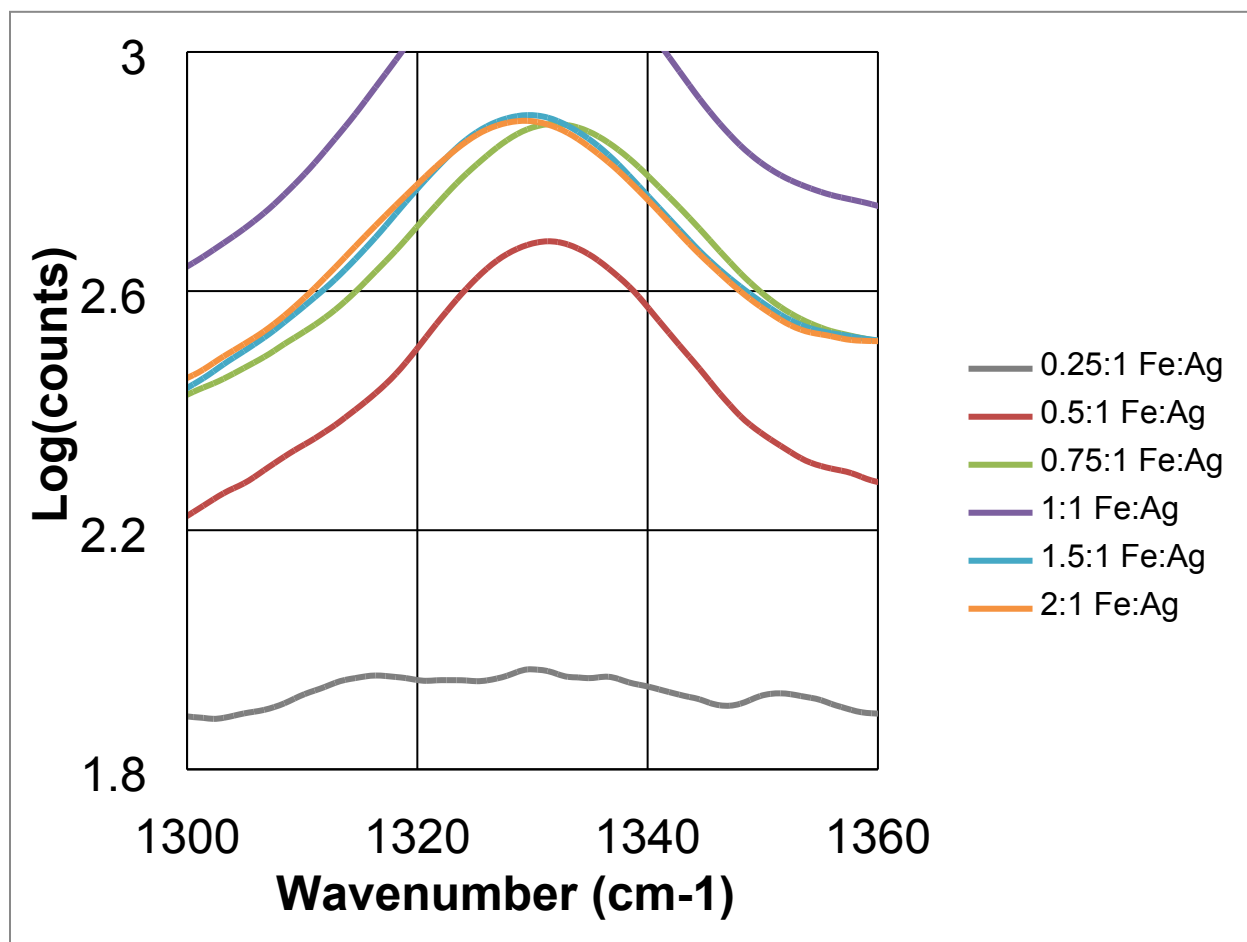

Figure S2. Figure S1 plot expanded from  $1300\text{ cm}^{-1}$  to  $1360\text{ cm}^{-1}$ . Raman spectra of DTNB with variation of the amount of maghemite in  $\text{AgJ}_{13}\text{NP-MH}$  as judged by the ratio between iron and silver (Fe:Ag). It can be clearly seen that the best ratio for detection of DTNB is 1:1 Fe:Ag. The  $[\text{DTNB}] = 7.41 \times 10^{-7}\text{ M}$  for all samples.

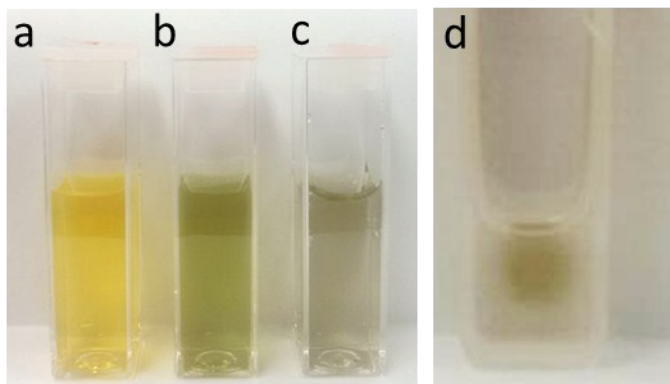

Figure S3. Optical images of  $\text{AgJ}_{13}\text{NP}\&\text{MH}$  samples: **a)** initially after mixing, **b)** 2 hours after mixing, and **c)** 4 hours after mixing; **d)** the pellet formed upon magnetic concentration of  $\text{AgJ}_{13}\text{NP}\&\text{MHs}$  in a quartz cell – the pellet remains intact after the removal of the magnet.

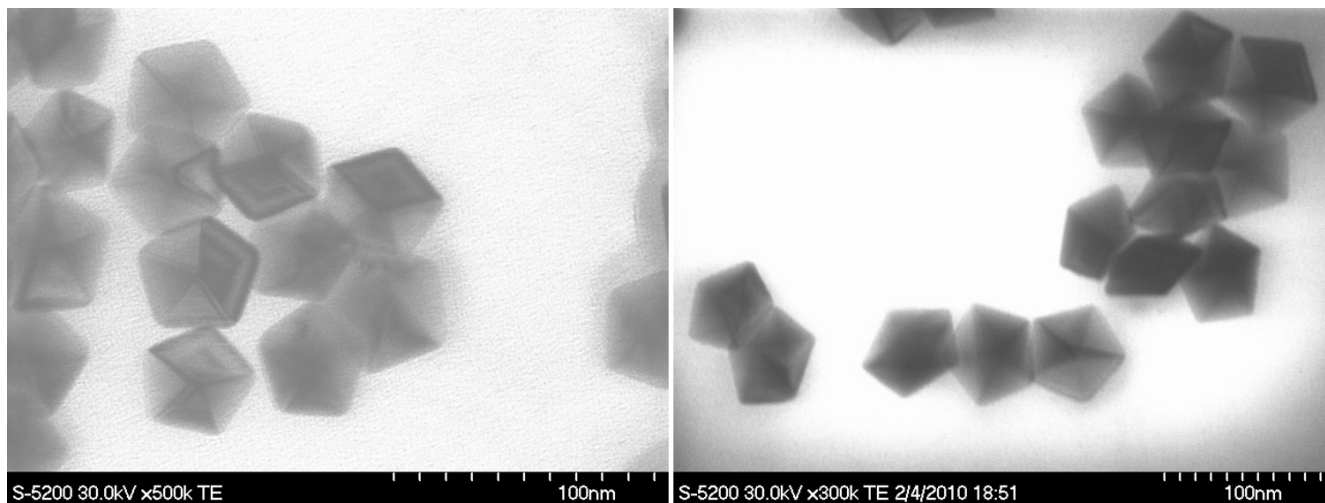

Figure S4. Representative transmission electron microscopy (TEM) images of AgJ<sub>13</sub>NPs.

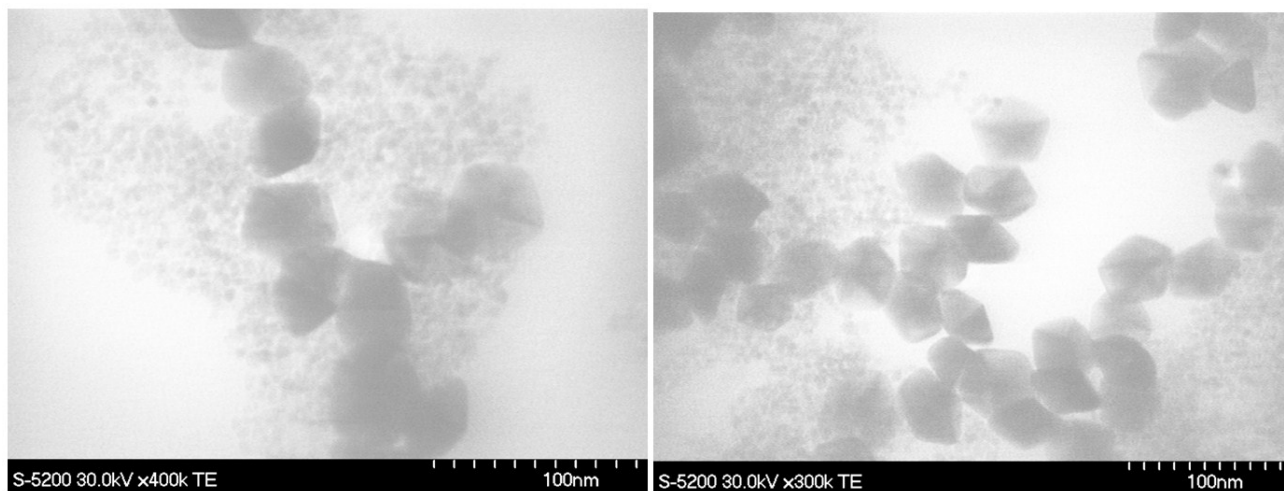

Figure S5. TEM images of the AgJ<sub>13</sub>NP&MH pellet components prepared by magnetic concentration and subsequent transfer to TEM grids.

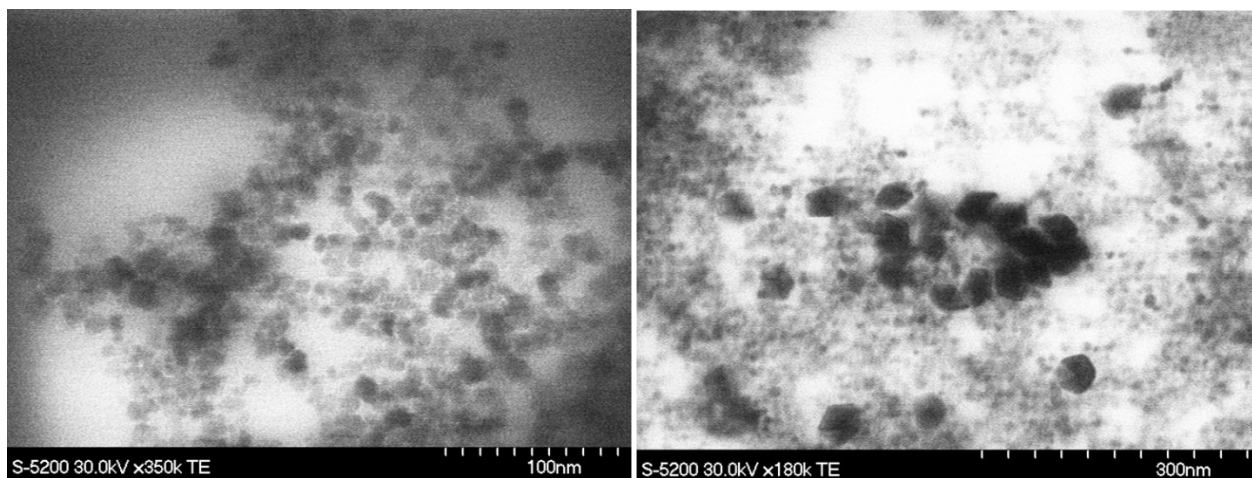

Figure S6. Representative TEM images of magnetite (MN) nanoparticles (left panel) and AgJ<sub>13</sub>NP&MNs (right panel).

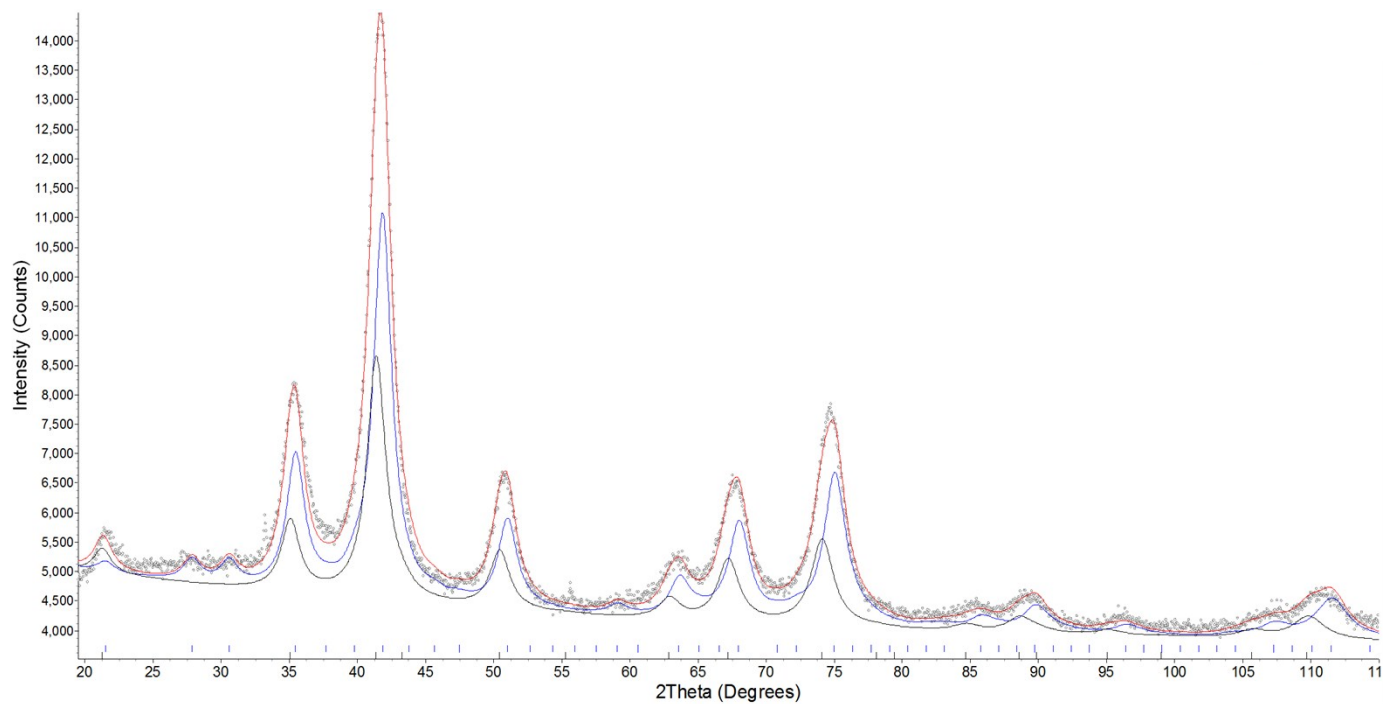

Figure S7. Powder X-ray diffraction data of the maghemite (MH) sample. Red line is an original spectra. Blue line and black lines corresponds to the deconvolution of maghemite and magnetite components, respectively.

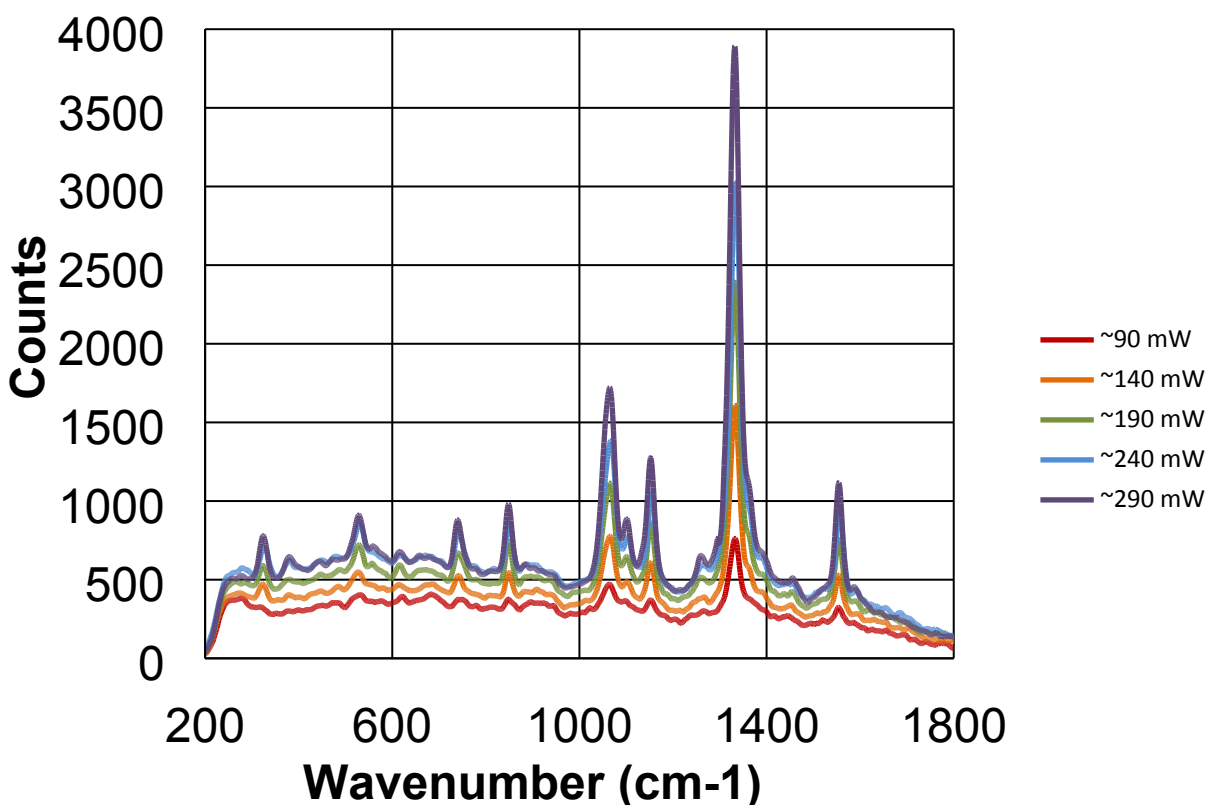

Figure S8. DTNB Raman spectra at different laser power ranging from 90 mW to 290 mW for 1:1 Fe:Ag using DTNB concentration of  $1.0 \times 10^{-4}$  M. 190 mW was selected as the laser power for all other measurements.

| Laser Power (mW) | Counts  | Counts/LP |
|------------------|---------|-----------|
| 90               | 536.30  | 5.96      |
| 115              | 874.93  | 7.61      |
| 140              | 1325.01 | 9.46      |
| 165              | 1886.57 | 11.43     |
| 190              | 2034.00 | 10.71     |
| 215              | 2381.64 | 11.08     |
| 240              | 2598.05 | 10.83     |
| 265              | 2788.30 | 10.52     |
| 290              | 3159.07 | 10.89     |

Table S3. Data on Raman signal intensity at  $1330 \text{ cm}^{-1}$  expressed as Counts and Counts/Laser Power (LP) for 1:1 Fe:Ag using DTNB concentration of  $1.0 \times 10^{-4}$  M. 190 mW was selected as the laser power for all other measurements.



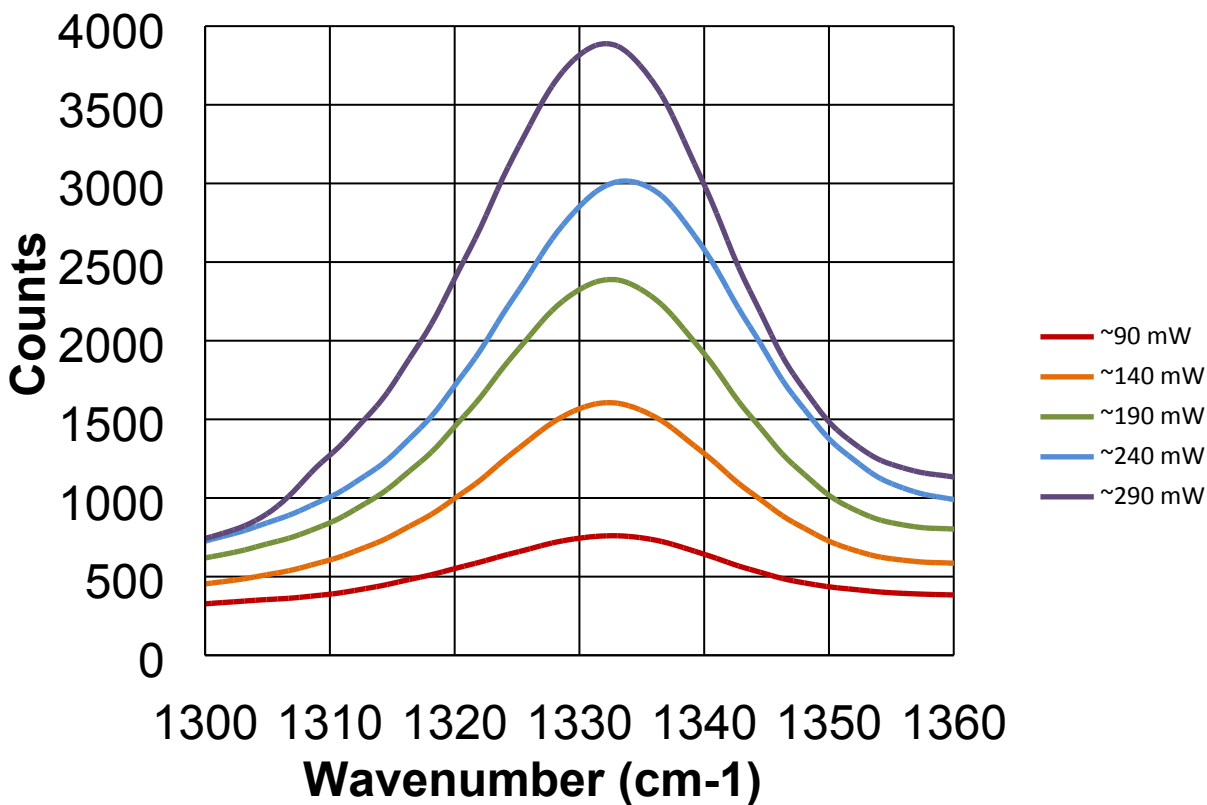

Figure S9. Figure S8 expanded from 1300  $\text{cm}^{-1}$  to 1360  $\text{cm}^{-1}$ . Raman laser power ranging from 90 mW to 290 mW for 1:1 Fe:Ag using DTNB concentration of  $1.0 \times 10^{-4}$  M. 190 mW was selected as the laser power for all other measurements.

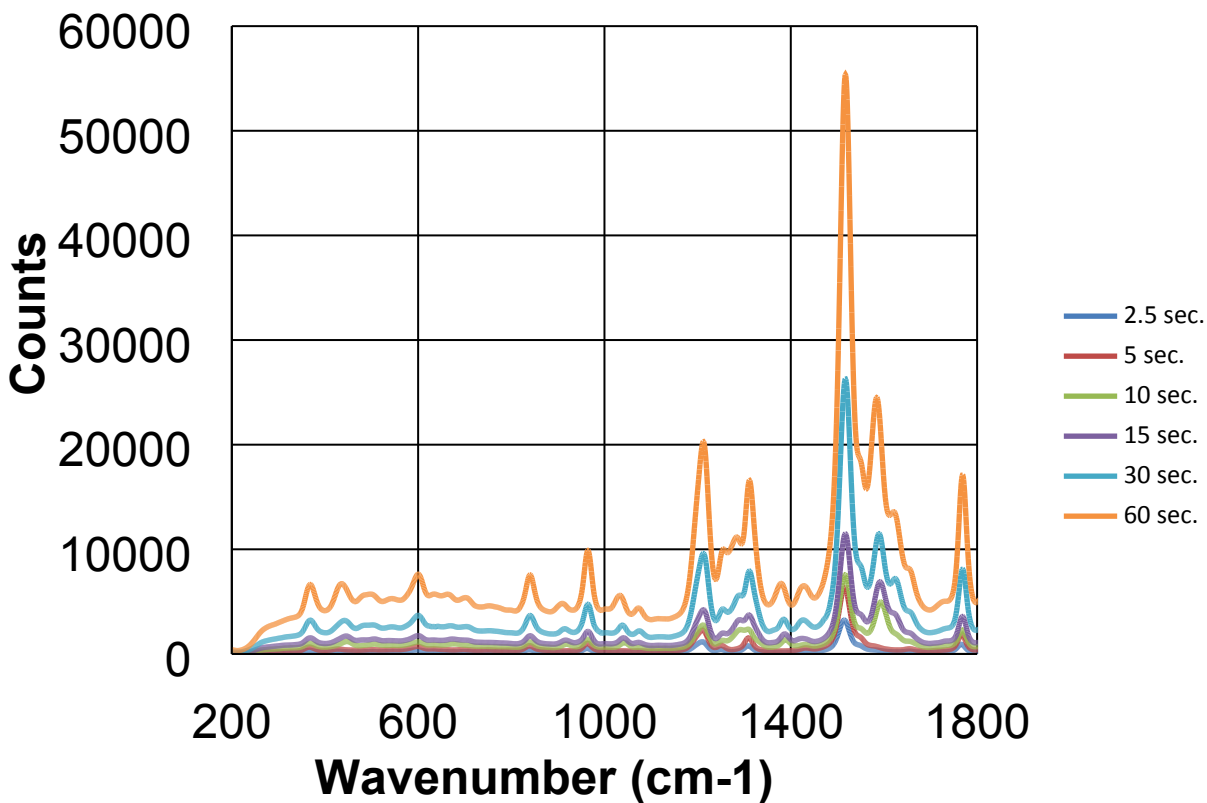

Figure S10. DTNB Raman spectra at different integration times ranging from 2.5 seconds to 60 seconds for 1:1 Fe:Ag for  $1.0 \times 10^{-4}$  M DTNB. An integration time of 5 seconds was selected for all measurements.

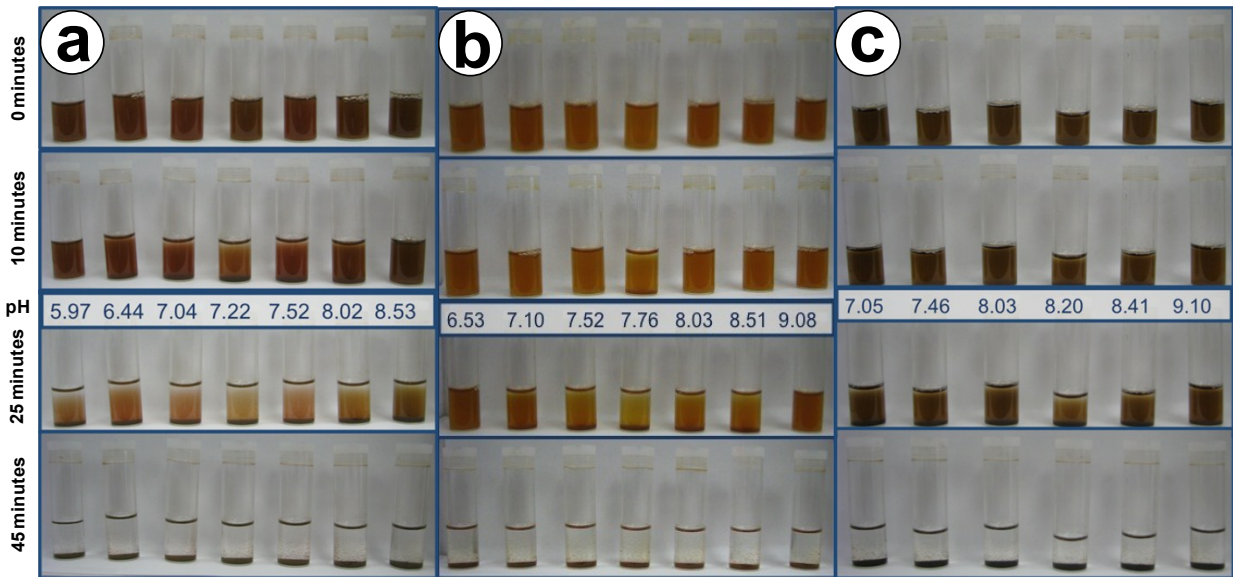

Figure S11. Optical photographs demonstrating colloidal stability of nanoparticle dispersions with time at various pH values. (a) AgJ<sub>13</sub>NP-MH. (b) Maghemite. (c) Magnetite
